# Supplementary material for: Dysregulation of the DNA Damage Response and KMT2A Rearrangement in Fetal Liver Hematopoietic Cells
Source: PubMed Central journal article supplement (PMC4686171; doi:10.1371/journal.pone.0144540), 2015-12-11
Supplement: pone.0144540.s003.pdf [file pone.0144540.s003.pdf]

Fig S1

A

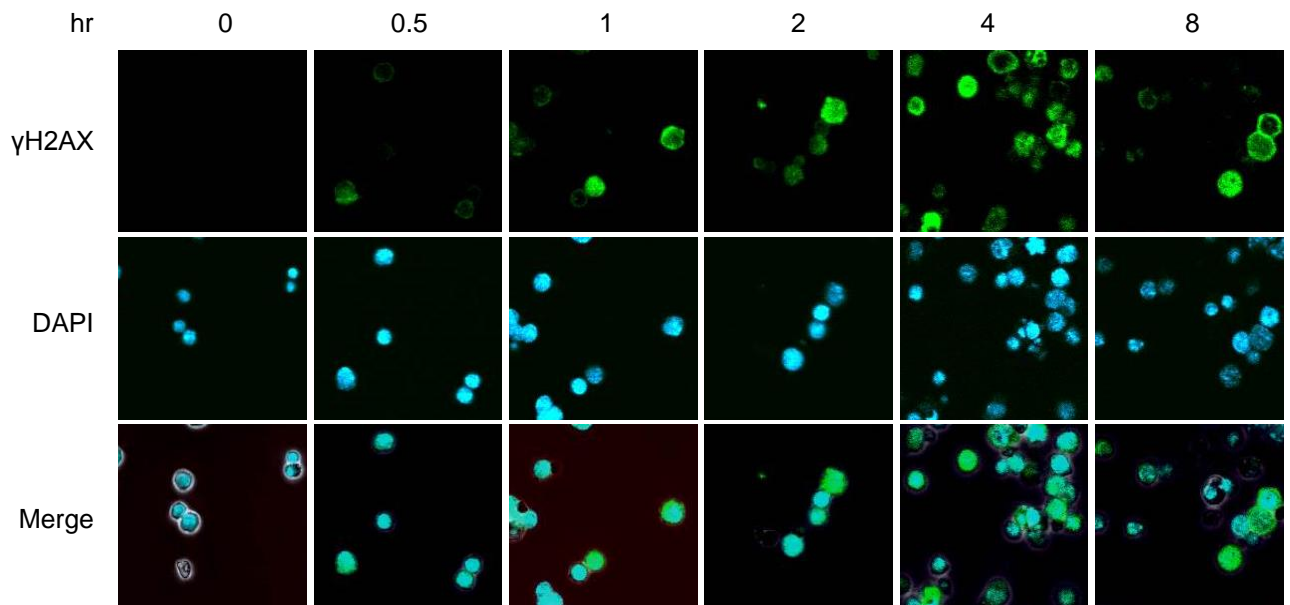

B

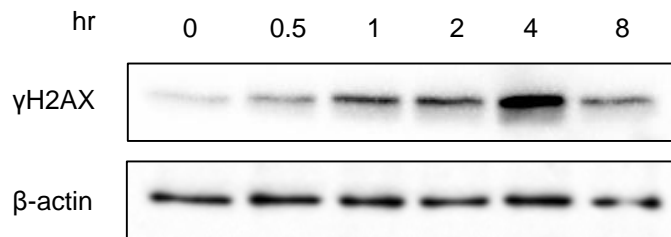

C

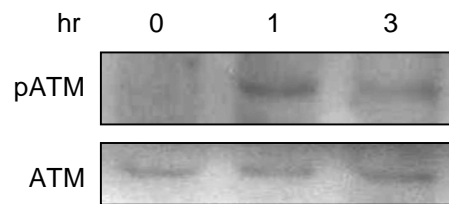

### Supplementary figure 1

(A) Immunofluorescence study of  $\gamma$ H2AX positivity. Green fluorescence indicates positivity for  $\gamma$ H2AX. Blue fluorescence indicates DAPI staining for nucleus. Experimental conditions were the same as those in Figure 2B and C. Etoposide (10 mg/kg) was IP injected into E13.5 pregnant mice, and FL-HSCs were analyzed at the indicated time points (hr). (B) Western blot analysis of  $\gamma$ H2AX positivity. Experimental conditions were the same as those in Figure 2B and C. Etoposide (10 mg/kg) was IP injected into E13.5 pregnant mice, and FL-HSCs were analyzed at the indicated time points (hr). (C) Western blot analysis of ATM activation. Etoposide (10 mg/kg) was IP injected into pregnant female mice on day 13.5, and FL-HSCs were analyzed at the indicated time points (hr).
