# Supplementary material for: Dysregulation of the DNA Damage Response and KMT2A Rearrangement in Fetal Liver Hematopoietic Cells
Source: PubMed Central journal article supplement (PMC4686171; doi:10.1371/journal.pone.0144540), 2015-12-11
Supplement: pone.0144540.s004.pdf [file pone.0144540.s004.pdf]

Fig S2

A  
NCBI Homo sapiens Annotation Release 107, 2015-03-13

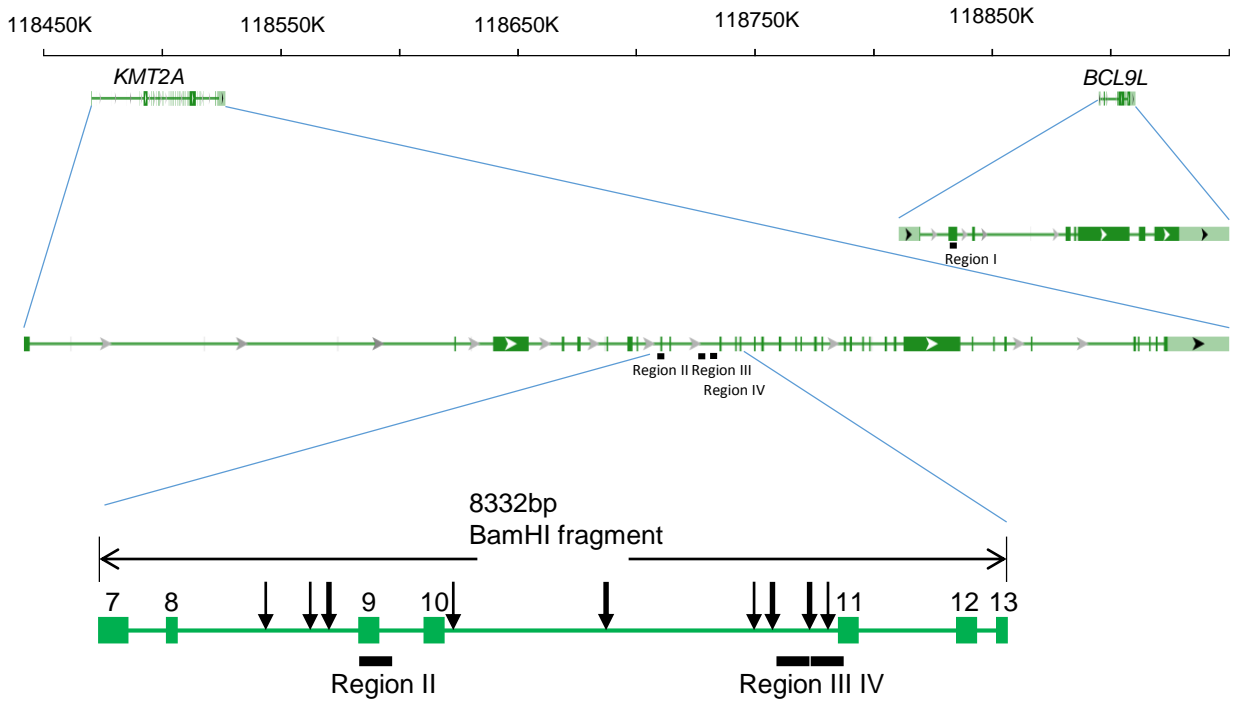

B  
NCBI Mus musculus Annotation Release 105, 2015-02-10

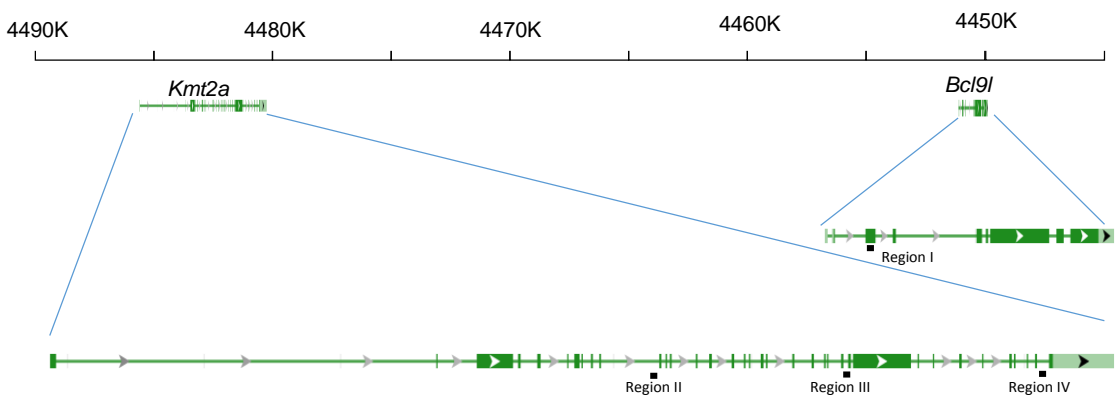

Supplementary figure 2  
A and B, Genome map and location of the *KMT2A* or *Kmt2a*, *BCL9L*, or *Bcl9l* genes based on GRCh38 and GRCm38. Green boxes indicate exons. A light green box indicates the untranslated region of the exon. Primer regions are shown in black boxes. Arrows indicate previously reported breakpoint regions.
