# Supplementary material for: Dysregulation of the DNA Damage Response and KMT2A Rearrangement in Fetal Liver Hematopoietic Cells
Source: PubMed Central journal article supplement (PMC4686171; doi:10.1371/journal.pone.0144540), 2015-12-11
Supplement: pone.0144540.s005.pdf [file pone.0144540.s005.pdf]

Fig S3

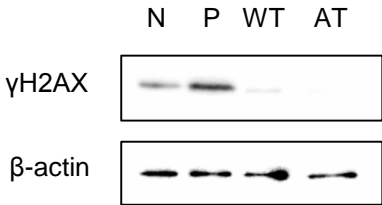

Supplementary figure 3

Western blot analysis of  $\gamma$ H2AX positivity. Etoposide (10 mg/kg) was IP injected into pregnant female mice on day 13.5, and samples were collected 24 h after injection. N: negative control using BV173 cells; P: positive control using BV173 cells after 10  $\mu$ M etoposide treatment for 3 h.
