# Supplementary material for: Dysregulation of the DNA Damage Response and KMT2A Rearrangement in Fetal Liver Hematopoietic Cells
Source: PubMed Central journal article supplement (PMC4686171; doi:10.1371/journal.pone.0144540), 2015-12-11
Supplement: pone.0144540.s006.pdf [file pone.0144540.s006.pdf]

A

|         | DMSO treated mouse |                           |                           |                           |            | Etoposide treated mouse |                           |                           |                           |            |
|---------|--------------------|---------------------------|---------------------------|---------------------------|------------|-------------------------|---------------------------|---------------------------|---------------------------|------------|
|         | Number of pups     |                           |                           |                           |            | Number of pups          |                           |                           |                           |            |
|         | total              | <i>Atm</i> <sup>+/+</sup> | <i>Atm</i> <sup>+/-</sup> | <i>Atm</i> <sup>-/-</sup> | stillbirth | total                   | <i>Atm</i> <sup>+/+</sup> | <i>Atm</i> <sup>+/-</sup> | <i>Atm</i> <sup>-/-</sup> | stillbirth |
| exp.1   | 8                  | 2                         | 3                         | 3                         | 0          | 8                       | 0                         | 5                         | 3                         | 0          |
| exp.2   | 9                  | 3                         | 2                         | 2                         | 2          | 8                       | 2                         | 5                         | 0                         | 1          |
| exp.3   | 10                 | 4                         | 3                         | 2                         | 1          | 7                       | 3                         | 3                         | 0                         | 1          |
| exp.4   | 6                  | 1                         | 5                         | 0                         | 0          | 5                       | 1                         | 1                         | 2                         | 1          |
| exp.5   | 6                  | 0                         | 0                         | 0                         | 6          | 6                       | 2                         | 3                         | 0                         | 1          |
| exp.6   | 6                  | 0                         | 4                         | 1                         | 1          | 7                       | 3                         | 3                         | 1                         | 0          |
| exp.7   | 9                  | 0                         | 0                         | 0                         | 9          | 5                       | 2                         | 2                         | 1                         | 0          |
| exp.8   |                    |                           |                           |                           |            | 10                      | 2                         | 3                         | 2                         | 3          |
| Total   | 54                 | 10                        | 17                        | 8                         | 19         | 56                      | 15                        | 25                        | 9                         | 7          |
| Average | 7.71               | 1.43                      | 2.43                      | 1.14                      | 2.71       | 7                       | 1.88                      | 3.13                      | 1.13                      | 0.88       |
| percent |                    | 18.52                     | 31.48                     | 14.81                     | 35.19      |                         | 26.79                     | 44.64                     | 16.07                     | 12.5       |

B

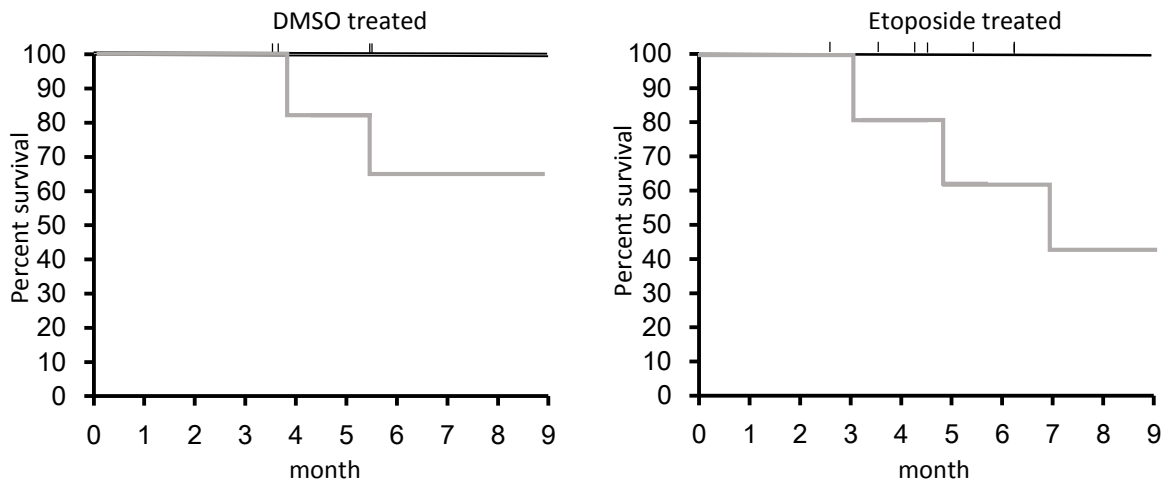

## Supplementary figure 4

(A) Number of pups derived by crossing *Atm*<sup>+/-</sup> mice after DMSO or etoposide treatment. Etoposide (0.5 mg/kg) or DMSO was administered for 3 days starting on day 13.5 of pregnancy. (B) Survival of pups derived by crossing *Atm*<sup>+/-</sup> mice after DMSO or etoposide treatment. Etoposide (0.5 mg/kg) or DMSO was administered for 3 days starting on day 13.5 of pregnancy. Grey line indicates *Atm*<sup>-/-</sup> mice. Black line indicates *Atm*<sup>+/+</sup> mice. Black dotted line indicates *Atm*<sup>+/-</sup> mice (overlapped with black line).
